# Supplementary material for: Beyond the label: The Moderating Role of beliefs about depression on the impact of labeling and diagnosis on public perceptions of people with depressive symptoms
Source: Research Square preprint supplement (doi:10.21203/rs.3.rs-7941377/v1), 2026-01-12
Supplement: Supplementary file 1 [file 4172f5d3e46749a9973abf4f.docx]

**Supplementary materials**

**for the paper entitled**

**Beyond the label: The Moderating Role of beliefs about depression on the impact of labeling and diagnosis on public perceptions of people with depressive symptoms**

**Procedure**

**Vignette (original):**

Wyobraź sobie, że jakiś czas temu na imprezie poznałaś/łeś Małgorzatę. Uznałaś/łeś, że Małgorzata jest interesującą osobą i miło spędziłyście/spędziliście czas na rozmowie. Dowiedziałaś/łeś się, że Małgorzata pracuje na pełen etat, lubi swoją pracę i jest w szczęśliwym długotrwałym związku. Kilka tygodni później zadzwoniłaś/łeś do Małgorzaty, żeby zaprosić ją na obiad. Małgorzata uprzejmie odmówiła, mówiąc, że ostatnio jest w gorszym nastroju niż zazwyczaj. Wspomniała również, że nie śpi dobrze i jest zmęczona przez większość dnia. Później powiedziała Ci także, że z jakiegoś powodu nie jest już tak bardzo zadowolona ze swojej pracy, choć w samej pracy nic się nie zmieniło. Dodała też, że ma problemy ze skupieniem się i nie może nawet czytać książek, co dotąd było jej największym hobby. Co gorsza, stwierdziła, że jej związek nie jest już dla niej satysfakcjonujący. Zauważyła, że jest ciągle zirytowana na swojego partnera i czuje się winna z tego powodu.

No Label × No Diagnosis (Control): Małgorzata zastanawia się, co się z nią dzieje.

Label × No Diagnosis: Małgorzata zastanawia się, czy ma depresję.

No Label × Diagnosis: Małgorzata poszła do lekarza i lekarz zdiagnozował, że to, w jaki sposób się czuje wynika z powodów medycznych.

Label × Diagnosis: Małgorzata poszła do lekarza i lekarz zdiagnozował, że to, w jaki sposób się czuje wynika z depresji.

**Vignette (translation)**

Imagine that some time ago, you met at a party someone named Margaret. You found Margaret interesting, and you had a good time talking to each other. You found out that Margaret has a full-time job that she likes and is in a happy long-term relationship.

A few weeks later, you called Margaret to invite her for lunch. Margaret kindly refused, saying that she had recently been in a worse mood than usual. She also mentioned that she doesn't sleep well and is tired for most of the day. Later she also told you that somehow, she is not so satisfied with her/his job anymore, even if nothing at work had changed. She added that she has problems with concentration and cannot even read books, which used to be her biggest hobby. Even worse, she claimed that her relationship was not so satisfying anymore. She noticed that she is constantly irritated with her/his partner, feeling guilty about it.

No Label × No Diagnosis (Control): Margaret wondered what was going on with her.

Label × No Diagnosis: Margaret wondered whether she might have depression.

No Label × Diagnosis: Margaret went to see a doctor, and the doctor diagnosed that the way she feels is due to her medical condition.

Label × Diagnosis: Margaret went to see a doctor, and the doctor diagnosed that the way she feels is due to depression.

**Questioned served as attention checks (original):**

Co zmieniło się w pracy Małgorzaty od momentu spotkania jej na przyjęciu do momentu rozmowy telefonicznej?

1. Dostała awans
2. Przestała lubić swoją pracę pomimo tego, że nic w pracy się nie zmieniło
3. Zaczęła szukać nowej pracy
4. Była tak samo zadowolona ze swojej pracy

Jaka była odpowiedź Małgorzaty na zaproszenie na obiad?

1. Natychmiast zaakceptowała zaproszenie
2. Uprzejmie odmówiła z powodu zmian w nastroju
3. Nie odpowiedziała na zaproszenie
4. Zasugerowała spotkanie na kolacji zamiast na obiedzie

Jak zmieniło się podejście Małgorzaty do jej hobby, jakim jest czytanie?

1. Zaczęła częściej czytać
2. Straciła zainteresowanie czytaniem ze względu na problemy ze skupieniem się
3. Przerzuciła się na inny rodzaj literatury
4. Dołączyła do klubu książki

**Questioned served as attention checks (translation):**

Between the party and the phone call, how did Margaret's feelings about her job change?

1. She got a promotion
2. She began to dislike her job, even though nothing at work changed
3. She started looking for a new job
4. She remained as happy with her job as before

What was Margaret's response when asked to go out for lunch?

1. She accepted immediately
2. She politely declined due to recent mood changes
3. She didn’t respond to the invitation
4. She suggested meeting for dinner instead

How did Margaret's attitude towards her hobby of reading alter?

1. She started reading more frequently
2. She lost interest and struggled to focus on reading
3. She switched to a different type of literature
4. She joined a book club

**Questions served as the measure of dependent variable (original)**

Twoim zdaniem, jak bardzo prawdopodobne jest to, że Małgorzata może mieć depresję?

Twoim zdaniem, jak bardzo prawdopodobne jest to, że Małgorzata może mieć jakieś zaburzenie zdrowia psychicznego?

Twoim zdaniem, jak bardzo prawdopodobne jest to, że Małgorzata może mieć jakieś problemy emocjonalne?

Twoim zdaniem, jak bardzo prawdopodobne jest to, że Małgorzata powinna poszukać pomocy psychologicznej?

Twoim zdaniem, jak bardzo prawdopodobne jest to, że Małgorzata może mieć jakiś problem medyczny?

Twoim zdaniem, jak bardzo prawdopodobne jest to, że Małgorzata może mieć jakiś problem zdrowotny?

Twoim zdaniem, jak bardzo prawdopodobne jest to, że Małgorzata może odczuwać znaczące symptomy medyczne?

Twoim zdaniem, jak bardzo prawdopodobne jest to, że Małgorzata powinna poszukać pomocy medycznej?

**Questions served as the measure of dependent variable (translation)**

In your opinion, how probable is it that Margaret might have depression?

In your opinion, how probable is it that Margaret might have some psychological disorder?

In your opinion, how probable is it that Margaret might experience some emotional distress?

In your opinion, how probable is it that Margaret should seek psychological help?

In your opinion, how probable is it that Margaret might have some medical condition?

In your opinion, how probable is it that Margaret might have some health problem?

In your opinion, how probable is it that Margaret might experience some medically significant symptoms?

In your opinion, how probable is it that Margaret should seek medical help?
